# Supplementary material
Source: Elsevier journal article supplement (https://www.sciencedirect.com/science/article/pii/S2173572721000758)

Apéndice C

Figura 7. Forest plot de la comparación de monitorización de presión esofágica durante la VM en pacientes críticos adultos vs monitorización estándar de la presión en la vía aérea y curvas de respirador para los días de VM en el subgrupo de pacientes con SDRA vs no SDRA.

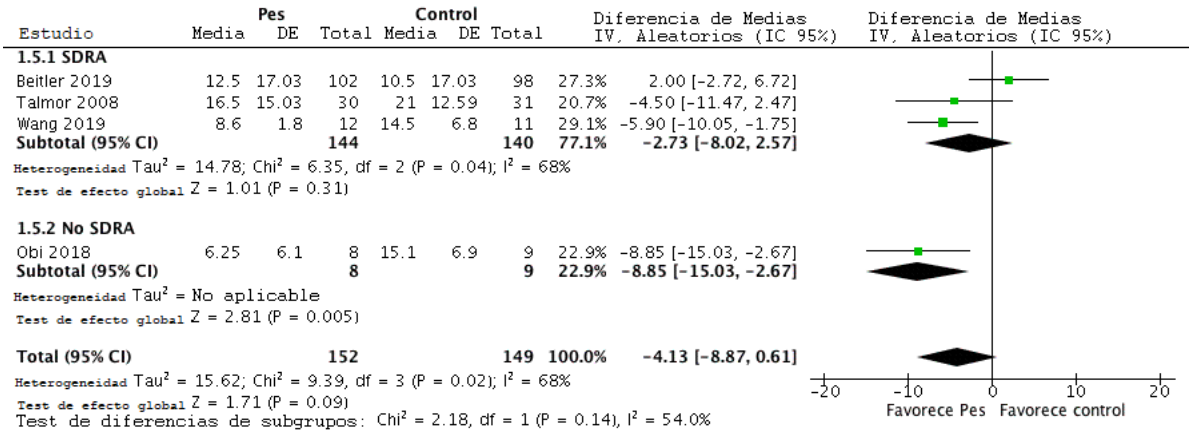

Figura 8. Forest plot de la comparación de monitorización de presión esofágica durante la VM en pacientes críticos adultos vs monitorización estándar de la presión en la vía aérea y curvas de respirador para los días de VM en el subgrupo de pacientes con obesidad vs sin obesidad.

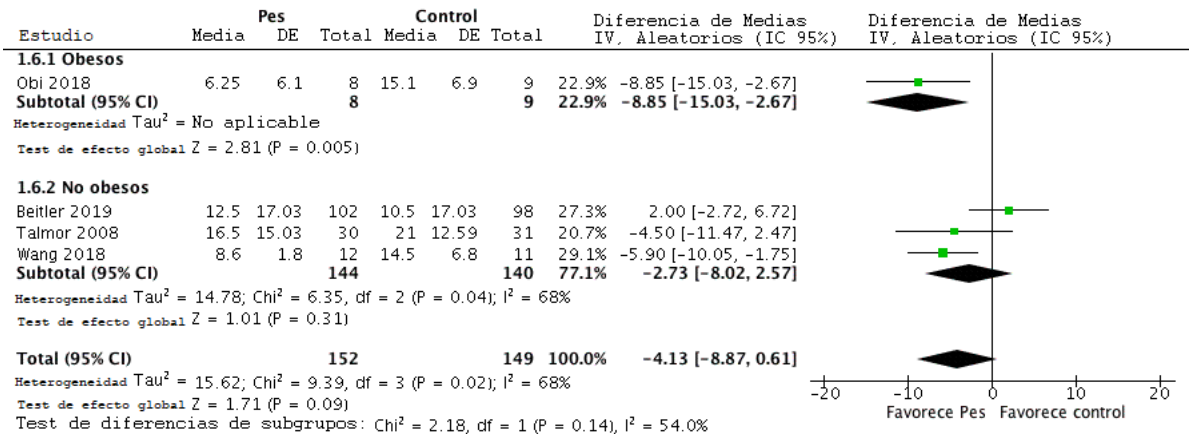

Figura 9. Forest plot de la comparación de monitorización de presión esofágica durante la VM en pacientes críticos adultos vs monitorización estándar de la presión en la vía aérea y curvas de respirador para los días de VM. Análisis de sensibilidad.

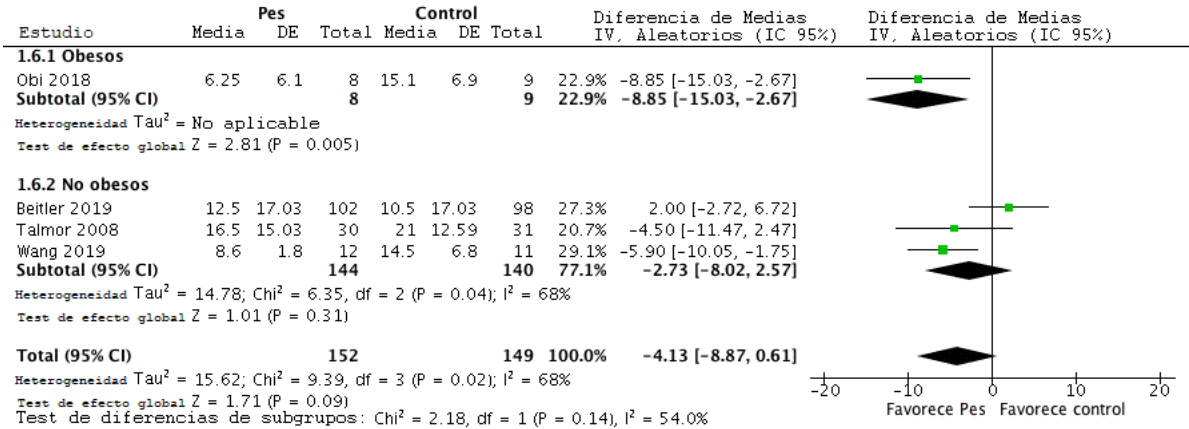

Figura 10. Forest plot de la comparación de monitorización de presión esofágica durante la VM en pacientes críticos adultos vs monitorización estándar de la presión en la vía aérea y curvas de respirador para los días de hospitalización en Terapia Intensiva. Análisis de sensibilidad.

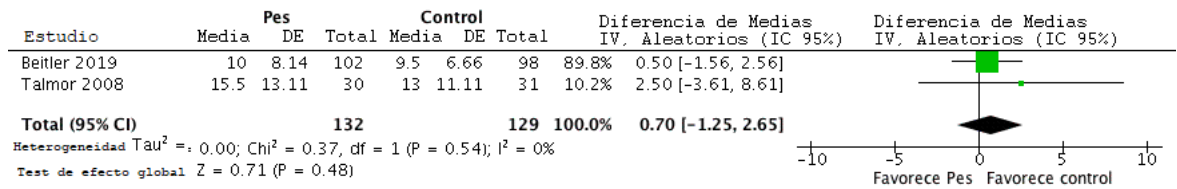

Supplement: mmc3 [file S2173572721000758:mmc3.pdf]
